# Supplementary material
Source: PubMed Central journal article supplement (PMC7809633)

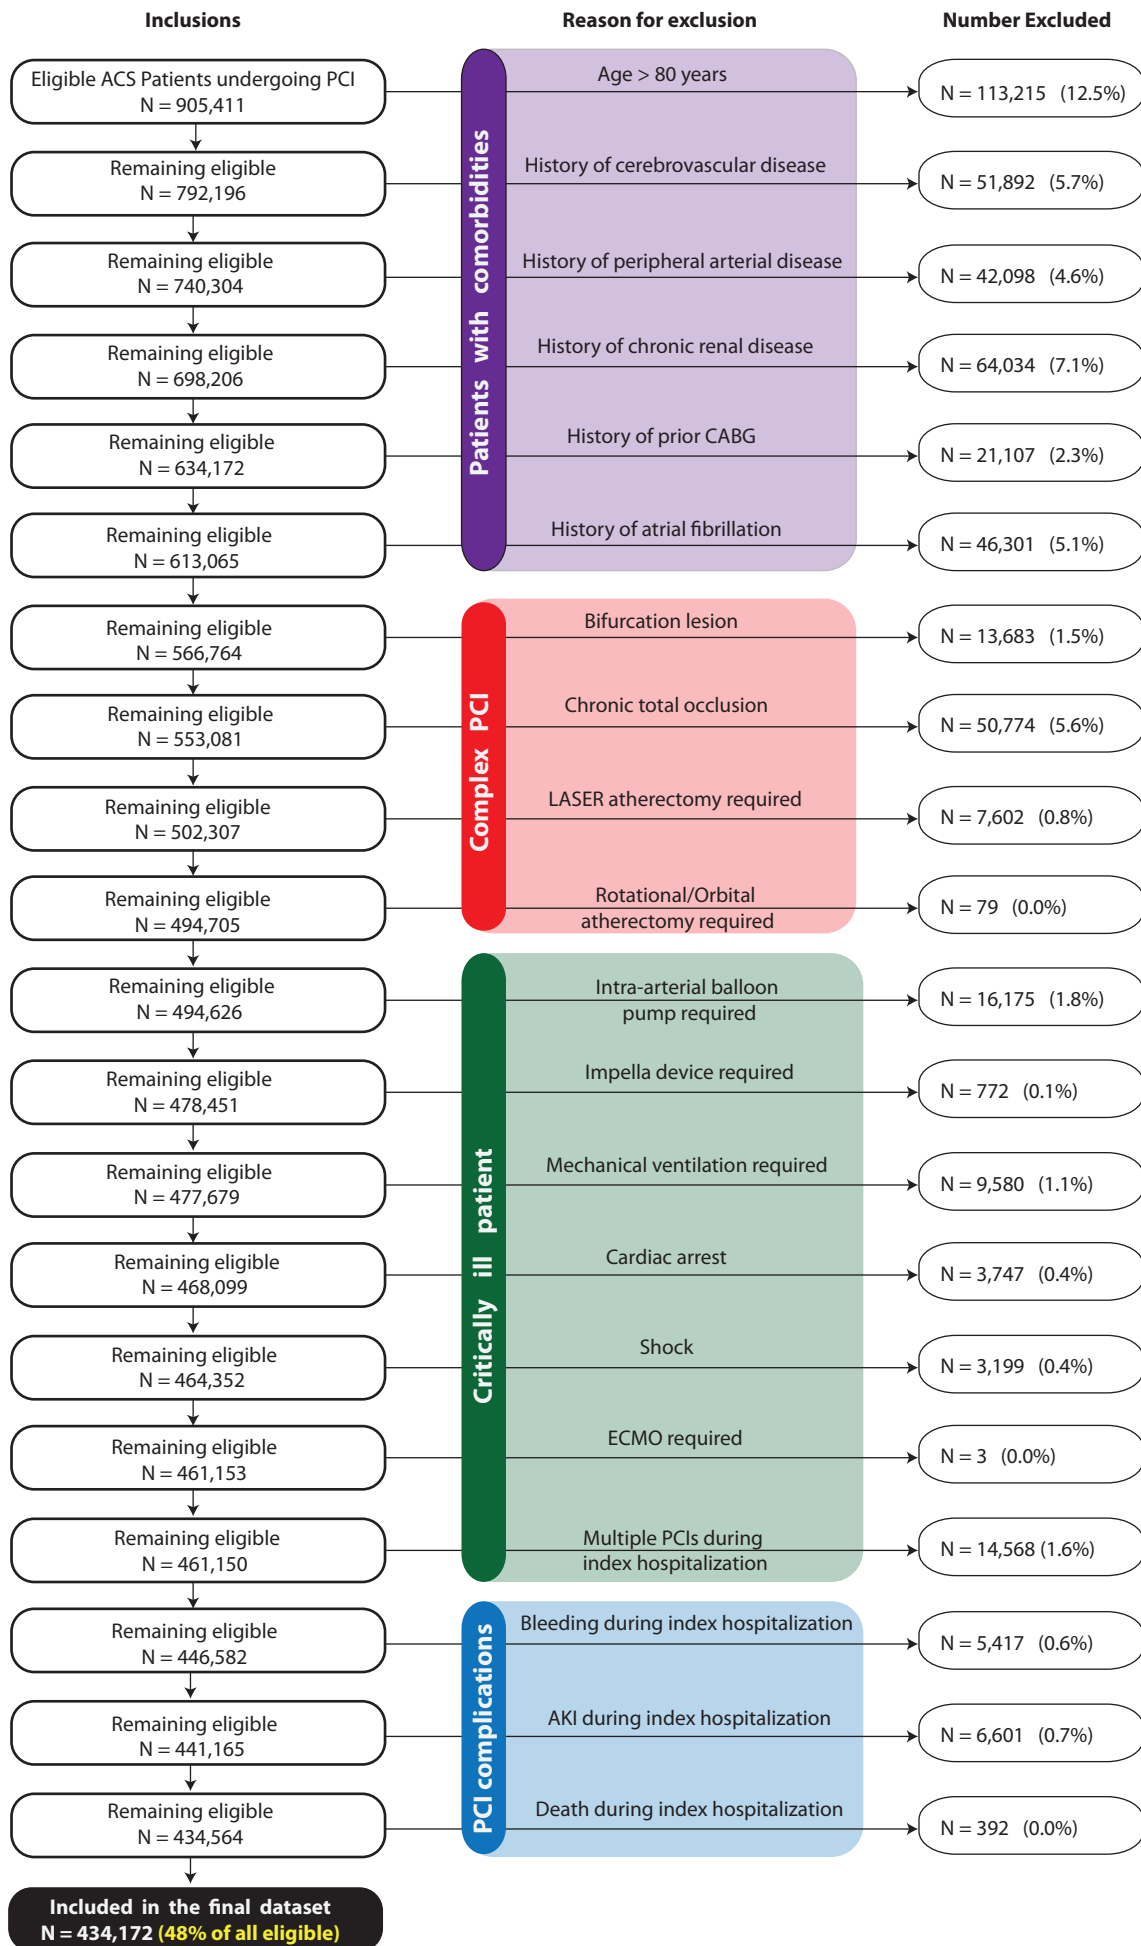

Supplement: NIHMS1631967-supplement-2.pdf [file NIHMS1631967-supplement-2.pdf]
